# Supplementary material
Source: publisher site journal article supplement (https://www.spandidos-publications.com/2245/downloadSupplementary)
Supplement: Supplementary file 1 [file downloadSupplementary]

Figure S1. GO enrichment analysis is composed of BP, CC and MF. (A) Number of GO enrichment items of source genes regulated by dysregulated lncRNAs. (B) Number of KEGG pathways associated with potential target genes of dysregulated lncRNAs. BP, biological process; CC, cellular component; MF, molecular function; lncRNA, long non-coding RNA; GO, Gene Ontology; KEGG, Kyoto Encyclopedia of Genes and Genomes.

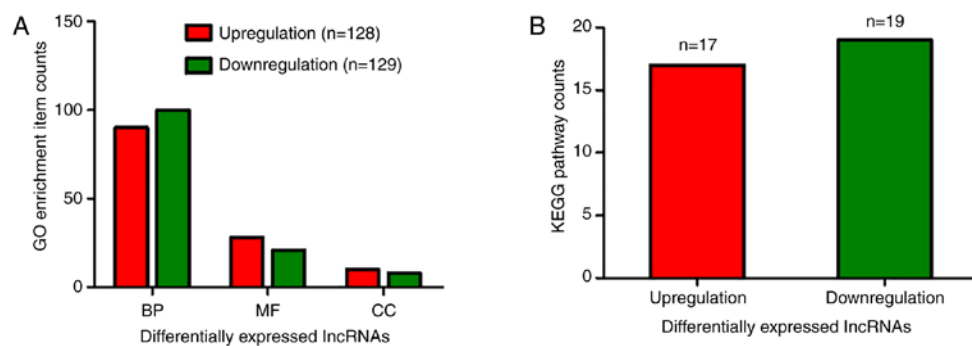



**A**

**LONGEVITY REGULATORY PATHWAY - MAMMAL**

**B**

**NON-ALCOHOLIC FATTY LIVER DISEASE (NAFLD)**

**C**

**ADIPOCYTOKINE SIGNALING PATHWAY**

C

Figure S4. Prediction program used to predict the potential regulatory genes of lncRNA-LOC729737 and lncRNA-BC041964. The potential target genes were screened associated with the pathogenesis of HT, and the data indicated that STAT3 and IL-21R were the potential target genes of lncRNA-LOC729737 and lncRNA-BC041964, respectively. (A) Relative expression of STAT3 mRNA in PBMCs from patients with HT and healthy controls was detected via RT-qPCR. (B) Correlation between the transcript levels of STAT3 and lncRNA-LOC729737 in patients with HT. (C) Relative expression of IL-21R in PBMCs from patients with HT and healthy controls was detected via RT-qPCR. (D) Correlation between the transcript levels of IL-21R and lncRNA-BC041964 in patients with HT. Each data point represents an individual subject, horizontal lines indicate the mean. \* $P < 0.05$ , \*\*\* $P < 0.001$ . HT, Hashimoto's thyroiditis; lncRNA, long non-coding RNA; RT-qPCR, reverse transcription-quantitative PCR.

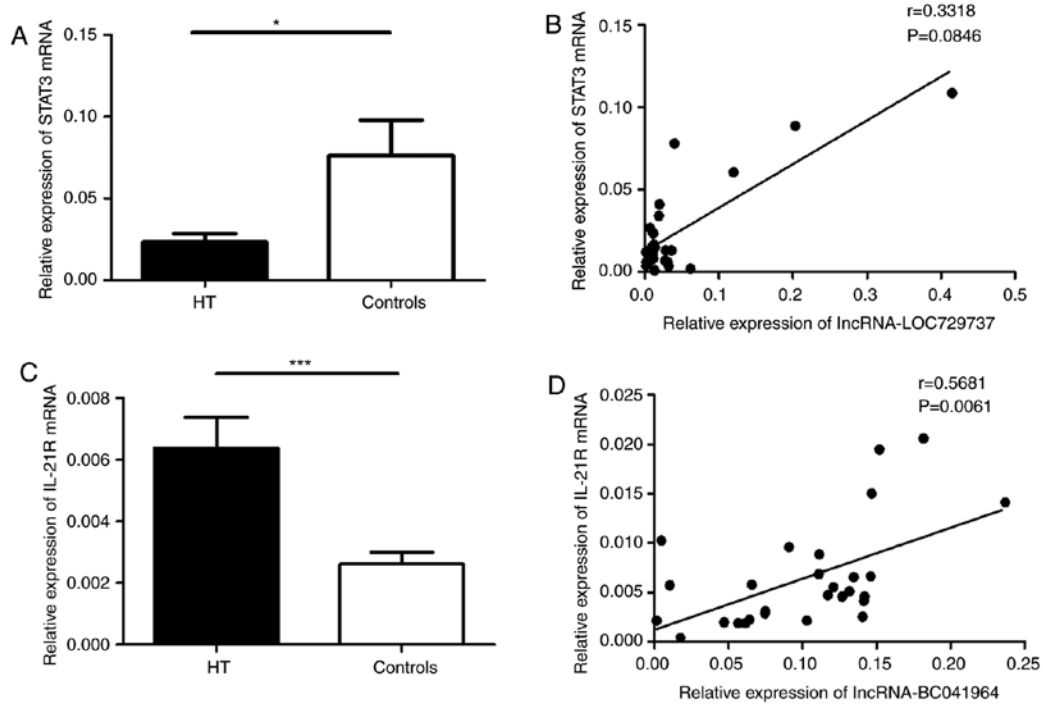

Table SI. Primer information of verified differentially expressed lncRNAs.

| Gene                                                              | Type    | Primer sequence             | Product size, bp |
|-------------------------------------------------------------------|---------|-----------------------------|------------------|
| lncRNA-LOC100288778                                               | Forward | 5-CCCGCGTGTCTCAGACTCCA-3    | 235              |
|                                                                   | Reverse | 5-CCAGCCTTCCGCTCCTTG-3      |                  |
| lncRNA-EPT1                                                       | Forward | 5-TCAGCACCAGGTCACAAGC-3     | 284              |
|                                                                   | Reverse | 5-CAGTGGGACAGGATGAAAGAA-3   |                  |
| lncRNA-BC041964                                                   | Forward | 5-CGGTGGCTCACGCCTGTA-3      | 168              |
|                                                                   | Reverse | 5-CCTGAGTAGCTGGGACGACA-3    |                  |
| lncRNA-XLOC_I2_006631                                             | Forward | 5-GAATGCCAGAACTGCTACCC-3    | 139              |
|                                                                   | Reverse | 5-CTGCCCTCTTTGCCCACT-3      |                  |
| lncRNA-AL137655_2                                                 | Forward | 5-CAACAGGAGGAGATAAGGAAGC-3  | 199              |
|                                                                   | Reverse | 5-CAGGAAGATGGGATGTAGAATGA-3 |                  |
| lncRNA-LOC729737                                                  | Forward | 5-TGGGCATAGGTTTGGTTTCC-3    | 267              |
|                                                                   | Reverse | 5-TGTGGCTCCTTGCGGCTC-3      |                  |
| β-actin                                                           | Forward | 5-CACGAACTACCTTCAACTCC-3    | 165              |
|                                                                   | Reverse | 5-CATACTCCTGCTTGCTGATC-3    |                  |
| STAT3                                                             | Forward | 5-TCCATCAGCTCTACAGTGACAGC-3 | 134              |
|                                                                   | Reverse | 5-TCCCAGGAGATTATGAAACACC-3  |                  |
| IL-21R                                                            | Forward | 5-CCCGACCTCGTCTGCTACA-3     | 101              |
|                                                                   | Reverse | 5-TGGTCTTGCCAGGTAAGGGT-3    |                  |
| MECP2                                                             | Forward | 5-TCGCTCTAAAGTGGAGTTGATT-3  | 134              |
|                                                                   | Reverse | 5-TGGGCTTCTTAGGTGGTTTC-3    |                  |
| lncRNA, long non-coding RNA; MECP2, Methyl-CpG-binding protein 2. |         |                             |                  |
